# Supplementary material
Source: publisher figshare collection journal article supplement (https://frontiersin.figshare.com/ndownloader/files/12470120)
Supplement: Supplementary file 1 [file 12470120]

| Registry Source Name                                                                                     | Access                                                                                                                                                                            |
|----------------------------------------------------------------------------------------------------------|-----------------------------------------------------------------------------------------------------------------------------------------------------------------------------------|
| International Telecommunications Union Registry                                                          | <a href="https://www.itu.int/pub/R-SP-LM.V-2016">https://www.itu.int/pub/R-SP-LM.V-2016</a>                                                                                       |
| Western and Central Pacific Fisheries Commission (WCPFC) Authorized Vessel Registry                      | <a href="https://www.wcpfc.int/record-fishing-vessel-database">https://www.wcpfc.int/record-fishing-vessel-database</a> ,                                                         |
| Consolidated List of Authorized Vessels (CLAV) Registry                                                  | <a href="http://www.tuna-org.org/GlobalTVR.htm">http://www.tuna-org.org/GlobalTVR.htm</a> .                                                                                       |
| International Commission for the Conservation of Atlantic Tunas (ICCAT)                                  | <a href="https://www.iccat.int/en/vesselsrecord.asp">https://www.iccat.int/en/vesselsrecord.asp</a>                                                                               |
| Indian Ocean Tuna Commission (IOTC) Registry of Authorized Vessels                                       | <a href="http://www.iotc.org/vessels/date">http://www.iotc.org/vessels/date</a>                                                                                                   |
| Inter American Tropical Tuna Commission (IATTC) Register of Authorized Vessels                           | <a href="https://www.iatcc.org/VesselRegister/VesselList.aspx?List=RegVessels&amp;Lang=ENG">https://www.iatcc.org/VesselRegister/VesselList.aspx?List=RegVessels&amp;Lang=ENG</a> |
| Commission for the Conservation of Southern Bluefin Tuna (CCSBT) Record of Authorized Vessels            | <a href="https://www.ccsbt.org/en/content/ccsbt-record-authorised-vessels">https://www.ccsbt.org/en/content/ccsbt-record-authorised-vessels</a>                                   |
| South Pacific Regional Fisheries Management Organization (SPRFMO) Record of Authorized Vessels           | <a href="https://www.sprfmo.int/data/record-of-vessels/">https://www.sprfmo.int/data/record-of-vessels/</a>                                                                       |
| Commission for the Conservation of Antarctic Marine Living Resources (CCAMLR) List of Authorized Vessels | <a href="https://www.ccamlr.org/en/compliance/list-authorised-vessels">https://www.ccamlr.org/en/compliance/list-authorised-vessels</a> ,                                         |

Table S1. Vessel registry data sources used to develop list of transshipment vessels. Additional information sources are described in the text.
